# Supplementary material for: The structural basis of lipid scrambling and inactivation in the endoplasmic reticulum scramblase TMEM16K
Source: PubMed Central journal article supplement (PMC6718402; doi:10.1038/s41467-019-11753-1), 2019-09-02
Supplement: 41467_2019_11753_MOESM3_ESM.pdf [file 41467_2019_11753_MOESM3_ESM.pdf]

## Description of Additional Supplementary Files

**File name:** Supplementary Movie 1

**Description:** Conformational morph between the LCP X-ray and the 2 mM  $\text{Ca}^{2+}$  cryo-EM structure. Structures are coloured based on the three main structural units identified by DYNDOM torsional analysis (static scaffold TM region (red), cytoplasmic domain (blue) and  $\beta 9$ - $\beta 10$ -TM3-5- $\alpha 10$  unit (orange)). Coordinate morphing and the movie creation were carried out using UCSF Chimera.
